# Supplementary material for: Properties of cell death models calibrated and compared using Bayesian approaches
Source: PubMed Central journal article supplement — Mol Syst Biol. 2013 Feb 5;9:644. doi: 10.1038/msb.2012.69 (PMC3588908; doi:10.1038/msb.2012.69), 2013-02-05
Supplement: msb201269-s1.pdf [file msb201269-s1.pdf]

**Table of Contents**

|                        |   |
|------------------------|---|
| Supplementary Figure 1 | 2 |
| Supplementary Figure 2 | 3 |
| Supplementary Figure 3 | 4 |
| Supplementary Figure 4 | 5 |
| Supplementary Figure 5 | 6 |

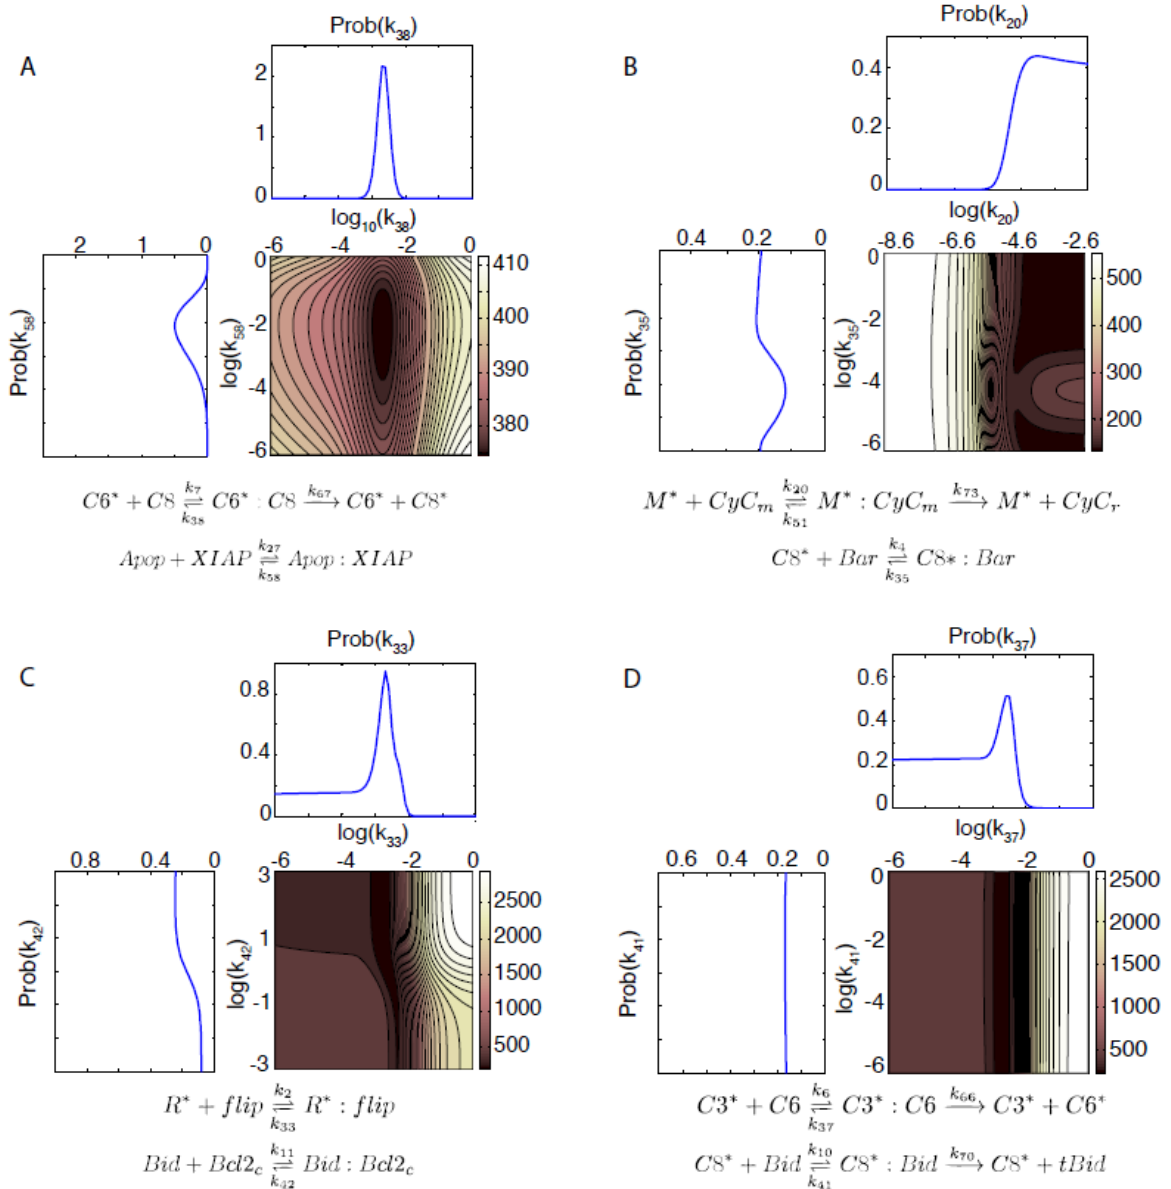

**Supplementary Figure 1.** A selection of 2D slices of the  $-\ln(\text{posterior})$  landscape for pairs of parameters with marginal posteriors. (A) A landscape of  $k_{38}$  vs  $k_{58}$  shows a minimum (corresponding to a maximum in the posterior) with both parameters described by approximately Gaussian distributions. (B) A landscape of  $k_{20}$  vs  $k_{35}$  shows two minima separated by a hump. The marginal of one parameter is bounded on only one side and the other parameter is largely non-identifiable. (C) A landscape of  $k_{33}$  vs  $k_{42}$  shows a canyon-like topography; the non-identifiable region runs mostly along the  $k_{42}$  axis. Marginal distributions show how the individual parameters are bounded on one side and unbounded on the other. (D) A landscape  $k_{37}$  vs  $k_{41}$  exhibits nonidentifiability in one parameter ( $k_{41}$ ) and the other ( $k_{37}$ ) has a minimum near the central region but plausible values also three orders of magnitude lower.

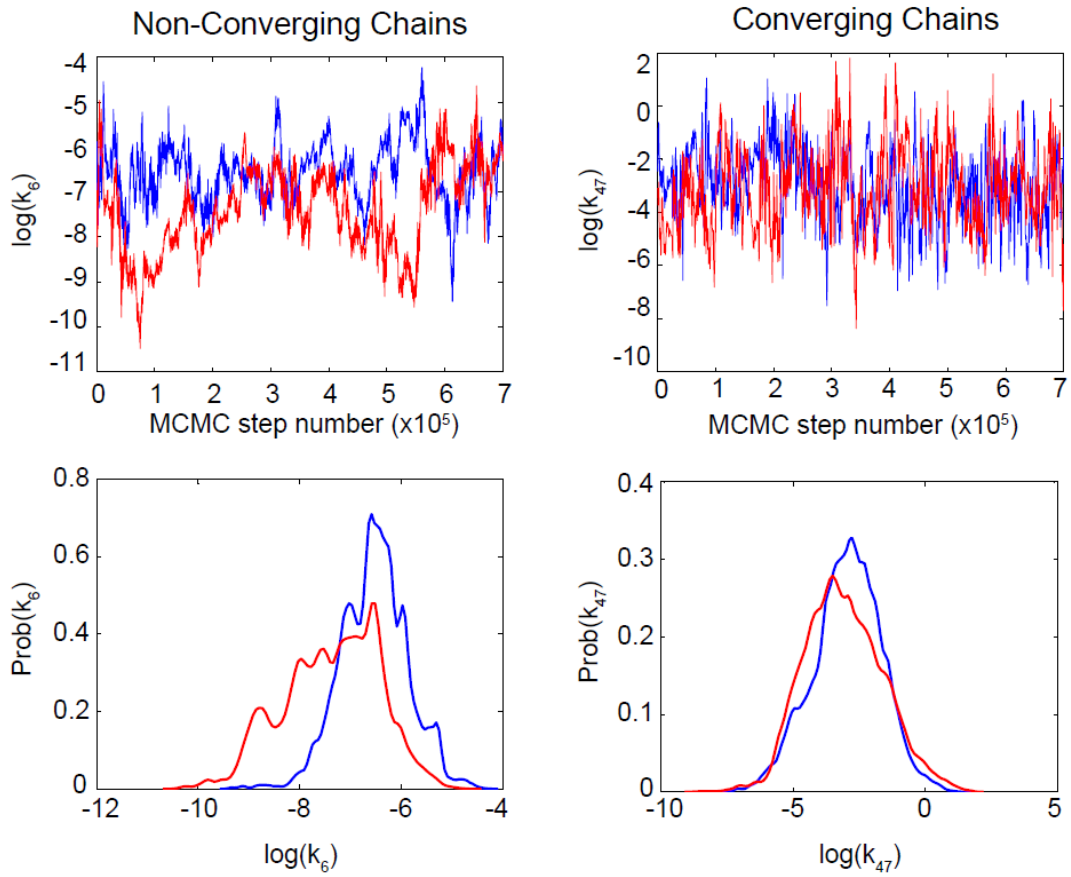

**Supplementary Figure 2.** Time-series of two chains that converge for parameter  $k_1$  (top right) and two chains that do not converge for parameter  $k_2$  (top left). Marginal distributions for convergent chains are much more similar (bottom right) than those for non-convergent chains (bottom left).

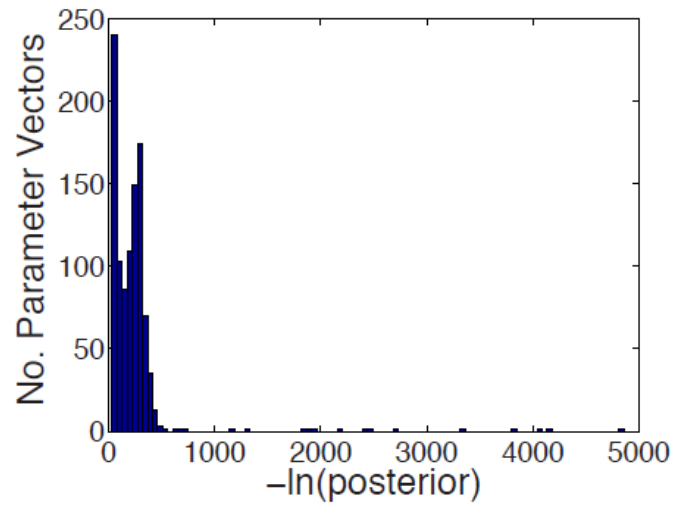

**Supplementary Figure 3.**  $-\ln(\text{posterior})$  values for trajectories generated from independent sampling of 10 most insensitive parameters: 5 for which the means of the marginal posterior deviated the least from the prior (ascertained by a t-test), and 5 for which the variance deviated the least (ascertained by a chi-squared variance test).

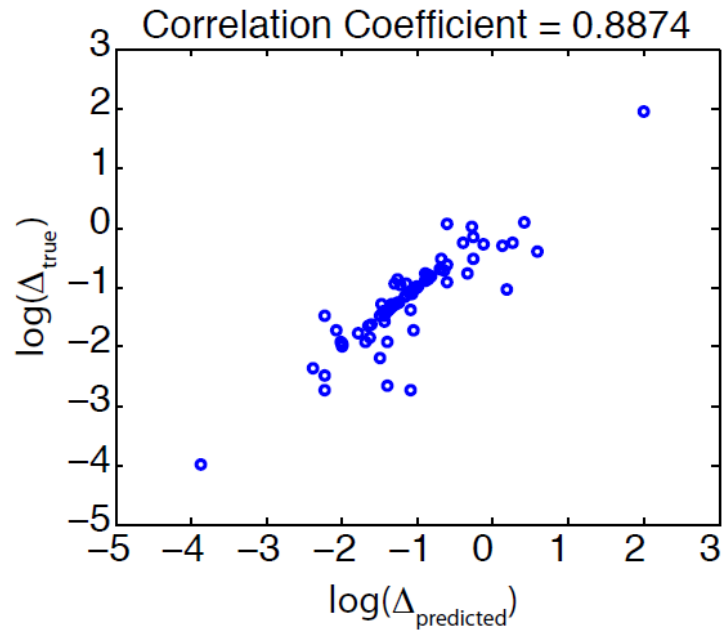

**Supplementary Figure 4.** Approximating parameter space using the Hessian, which is obtained from a second-order Taylor Series expansion, is justified by a high correlation coefficient value of 0.8874 between the true value of the posterior landscape,  $\Delta_{\text{true}}$ , and the Hessian-based prediction  $\Delta_{\text{predicted}}$ .

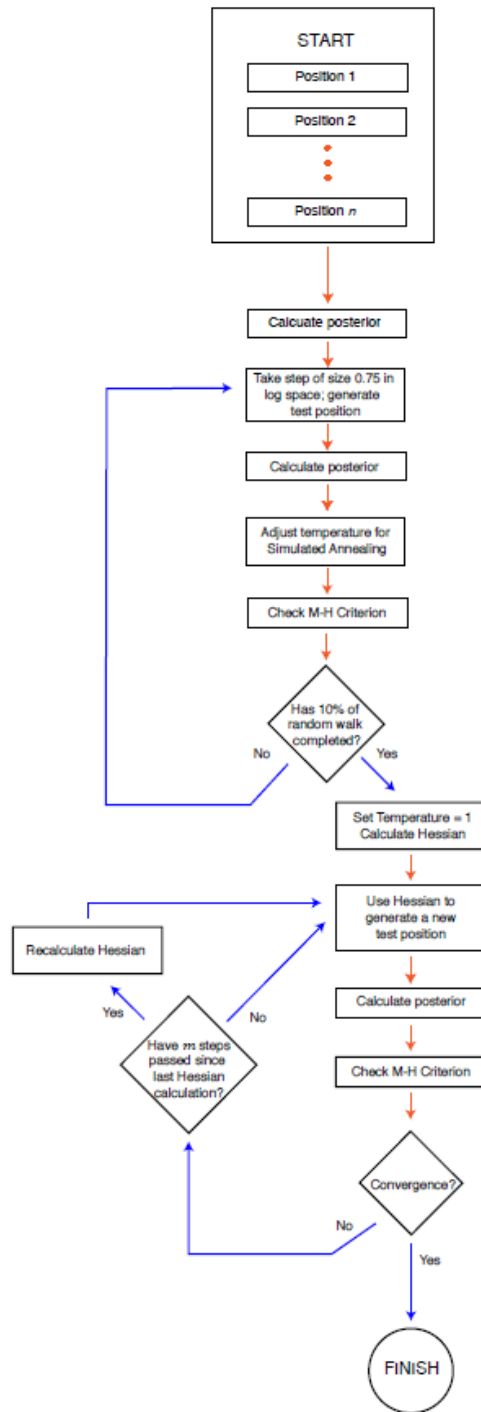

**Supplementary Figure 5.** A flowchart illustrating the algorithm described in this manuscript. The letter  $n$  denotes the number of independent, parallel chains that each start at random positions in parameter space. For the first 10% of the MCMC random walk, simulated annealing is performed and the steps sizes are 0.75 in log space. After the completion of the first 10% of the random walk, an MCMC walk is applied, guided by a local Hessian. The algorithm ends once the  $n$  chains reach convergence according to the Gelman-Rubin criterion.
